# Supplementary material
Source: PubMed Central journal article supplement (PMC3638263)

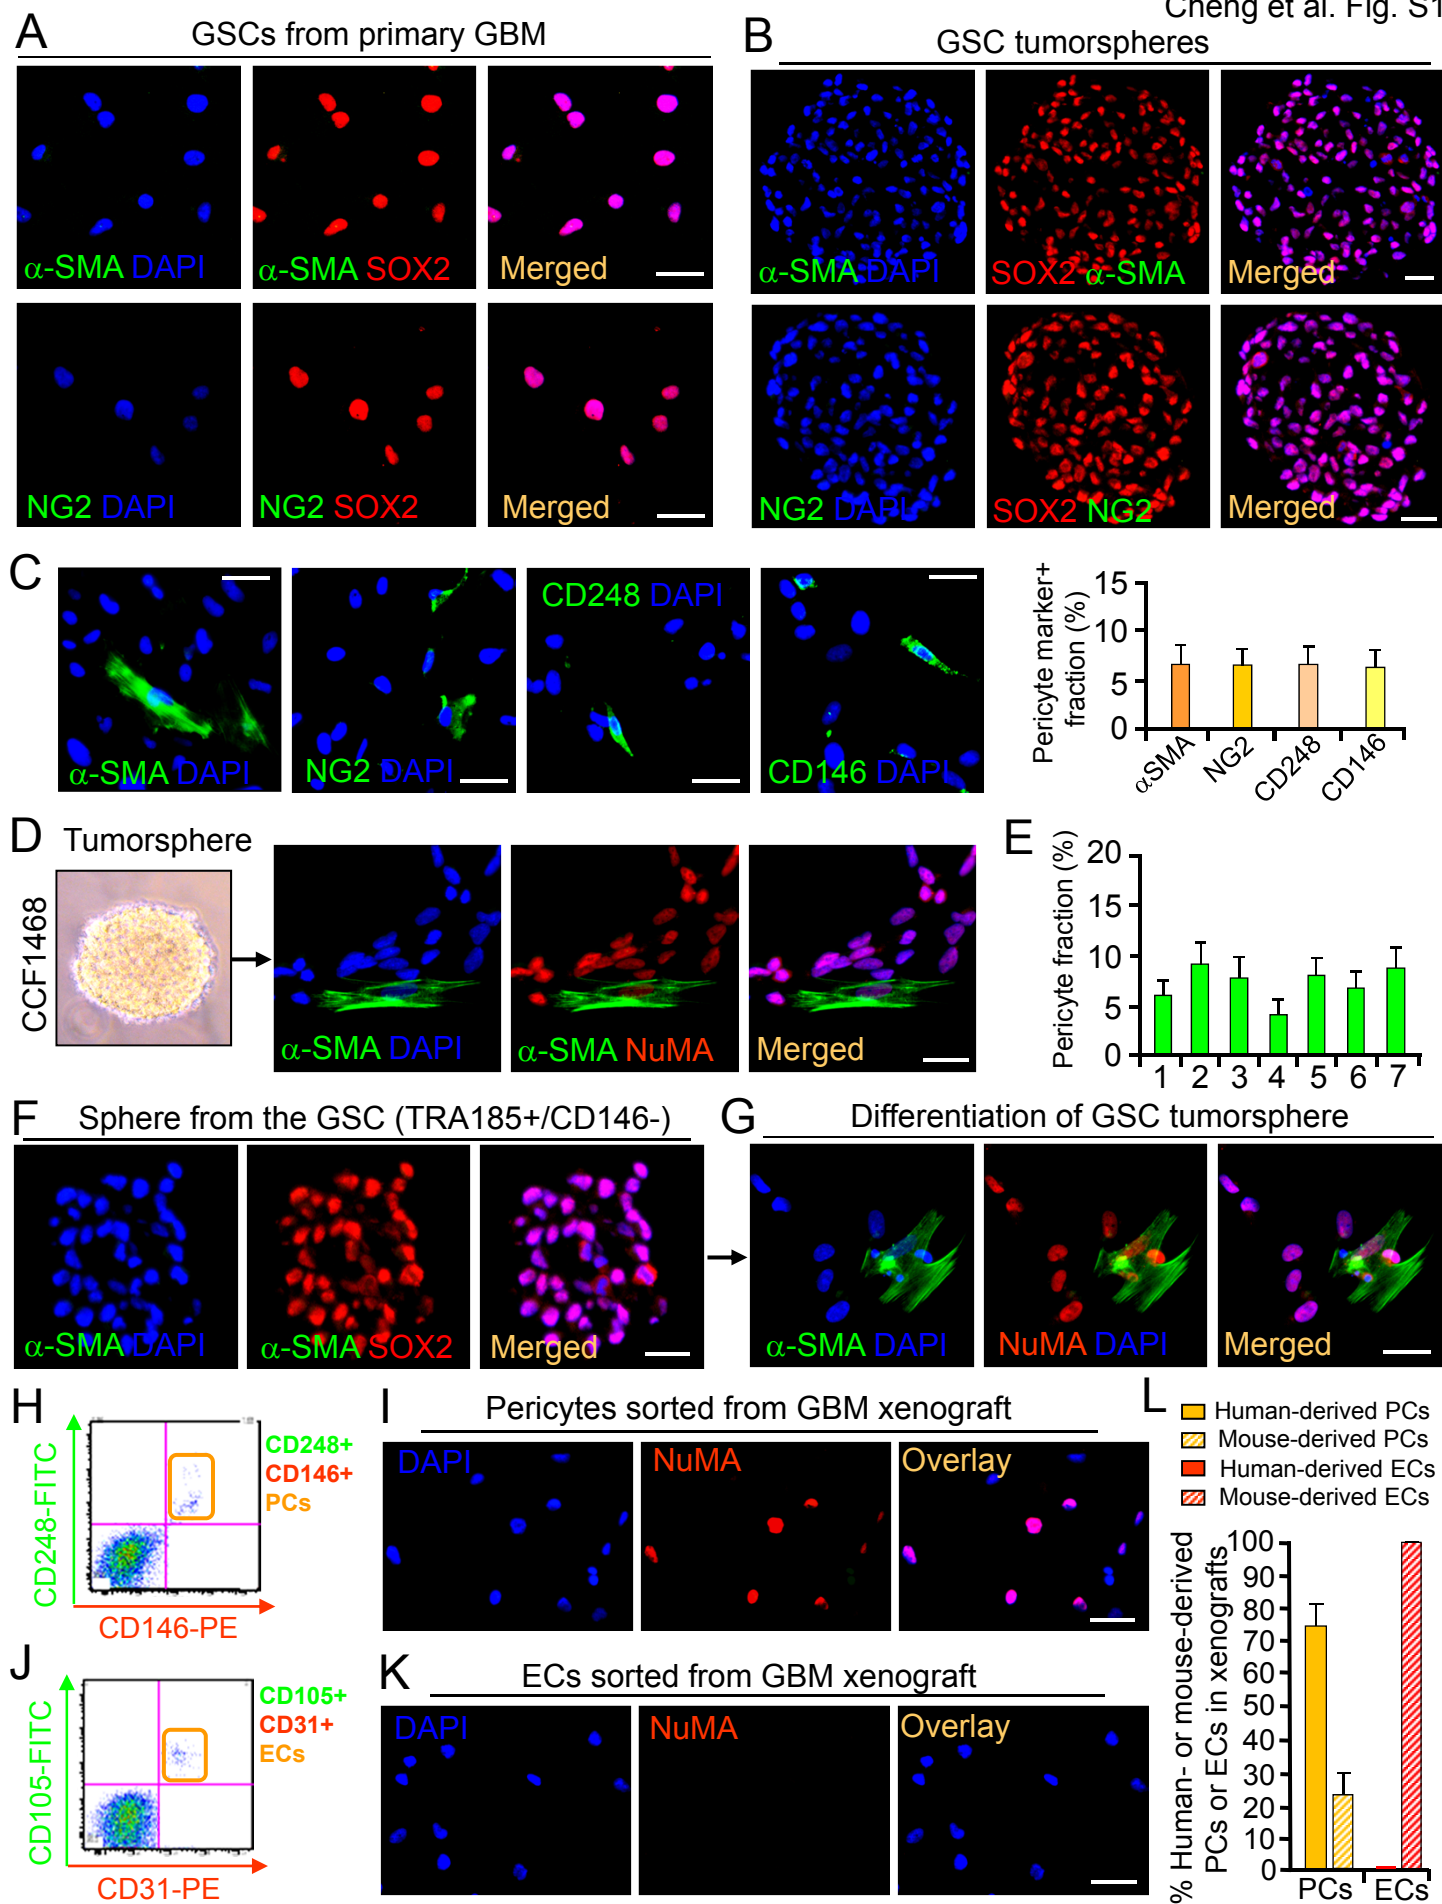

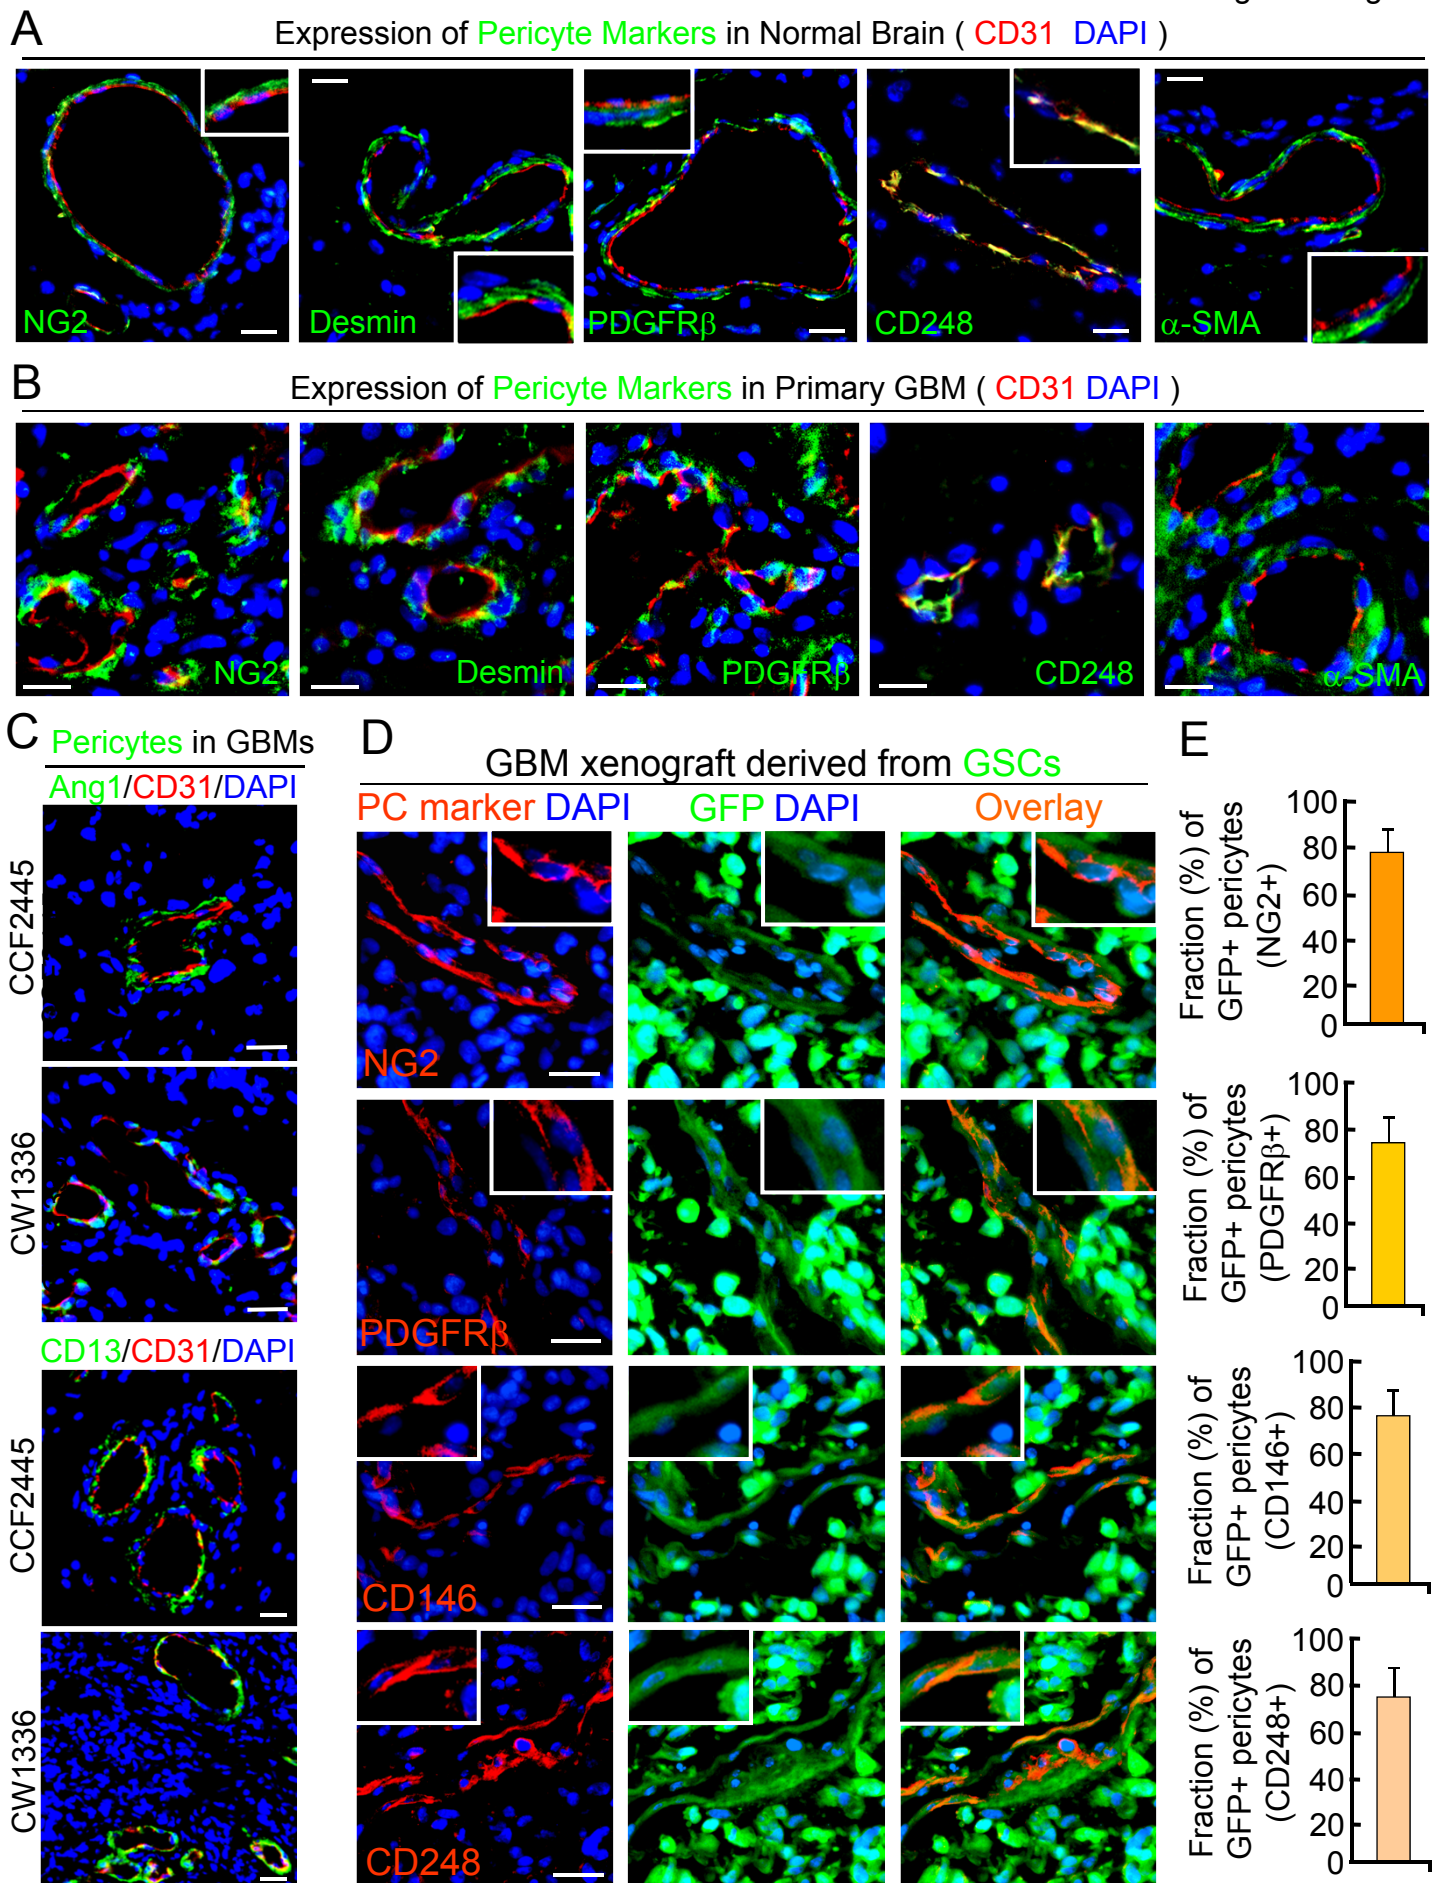

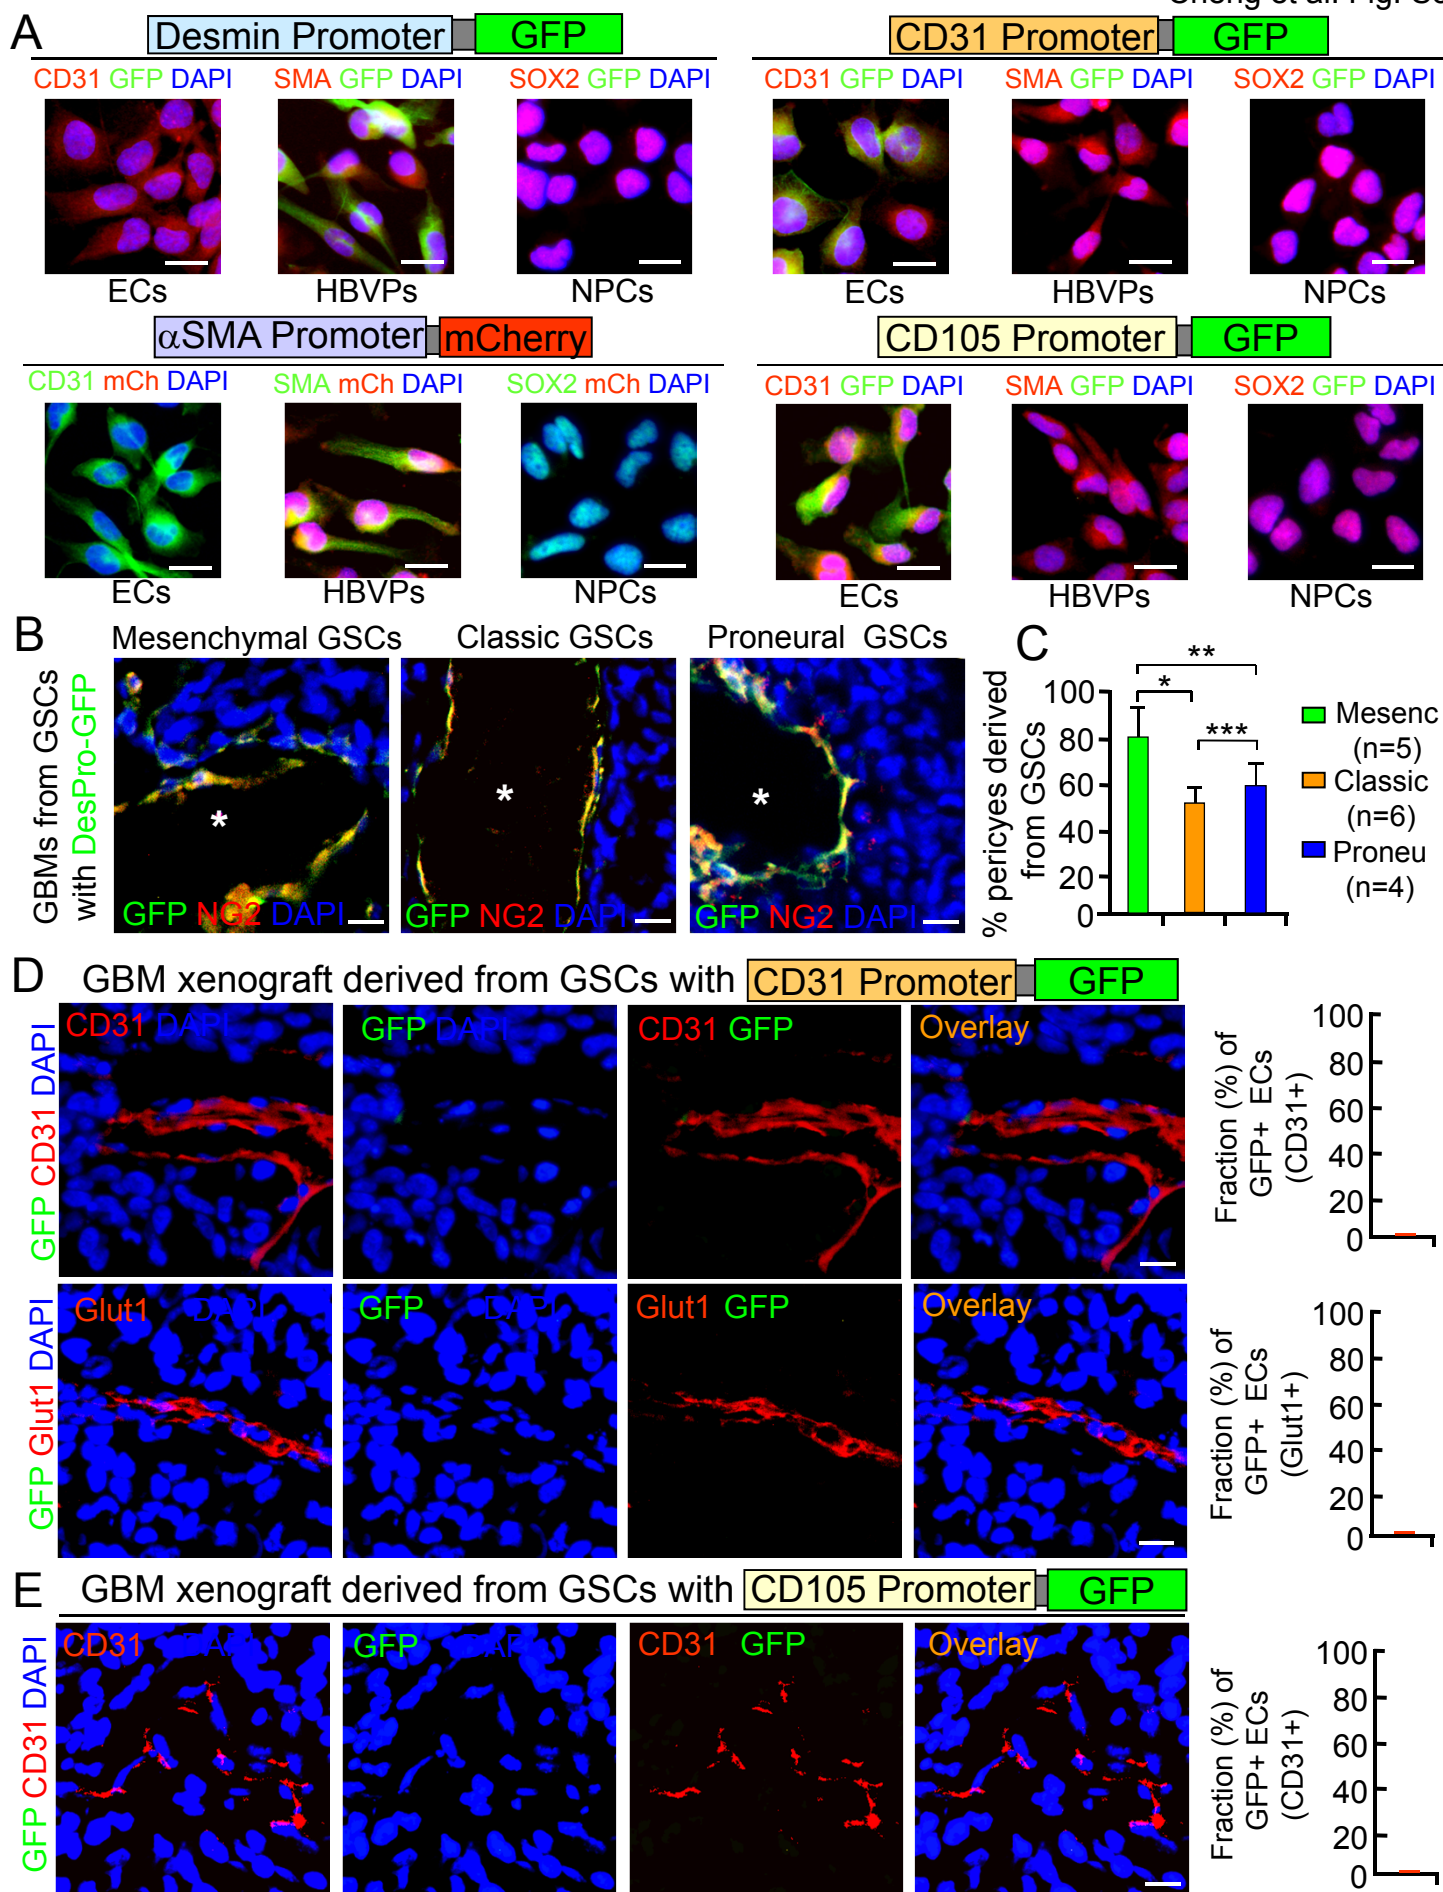

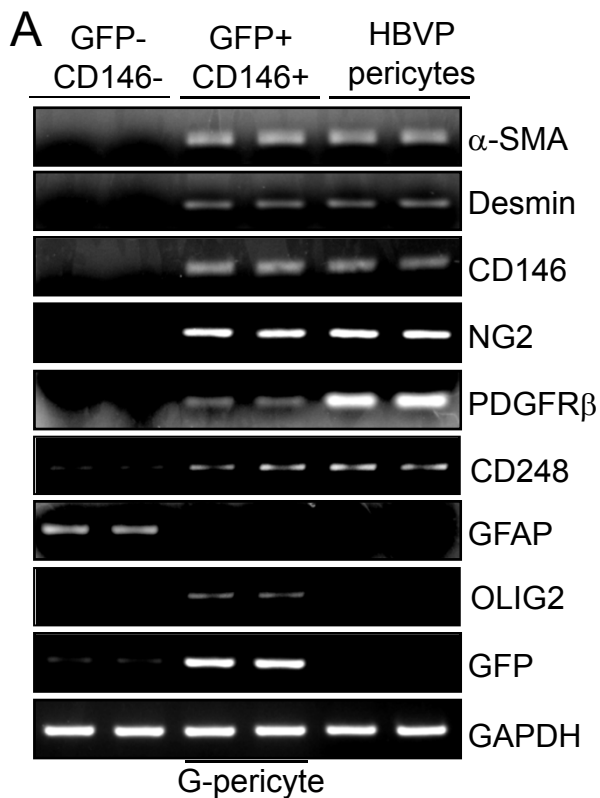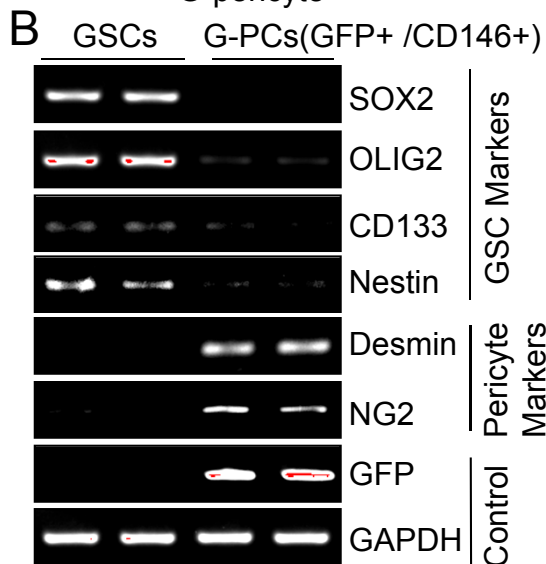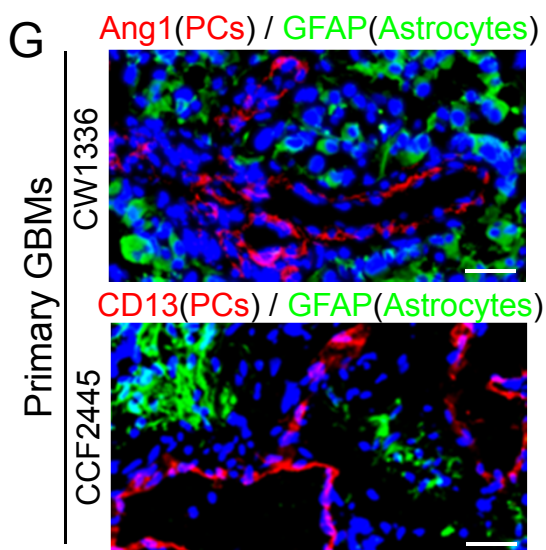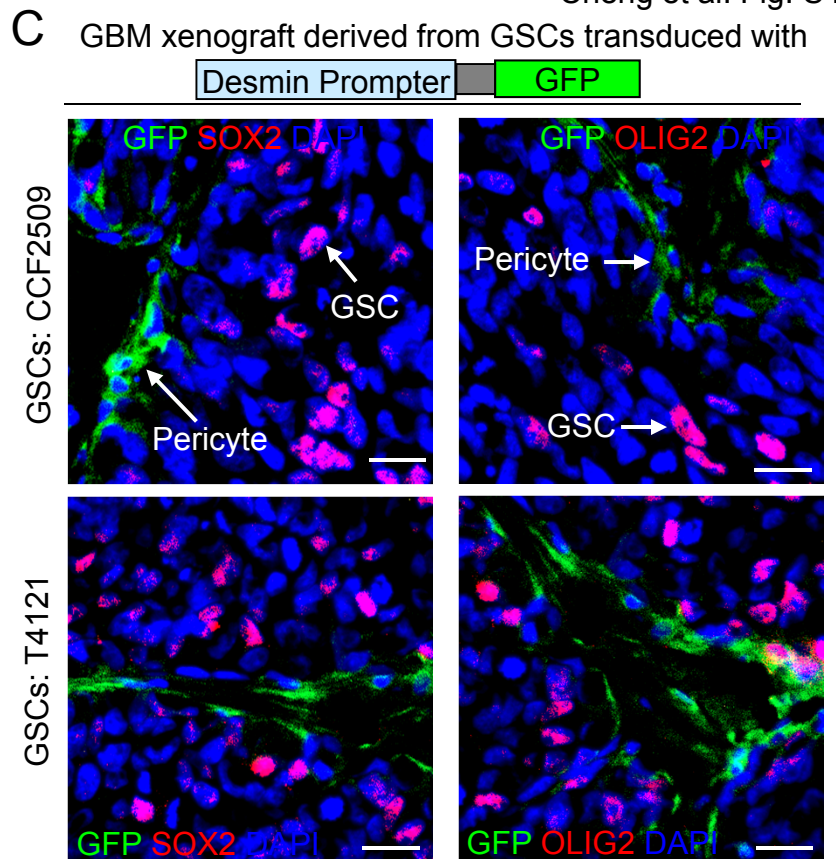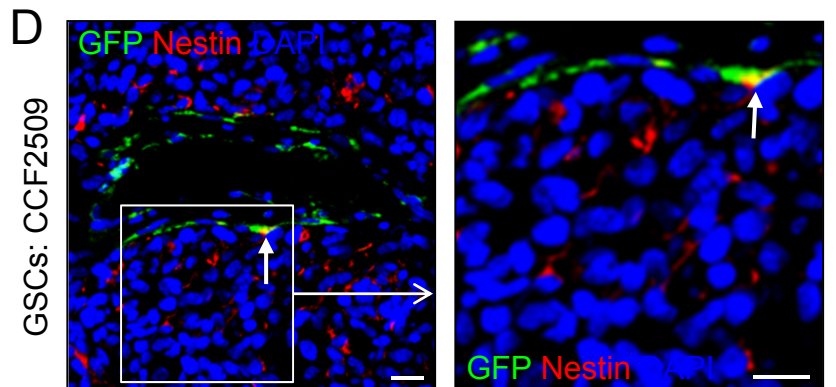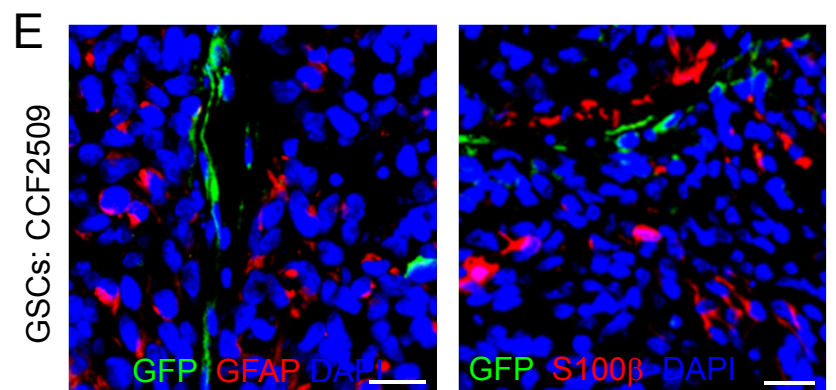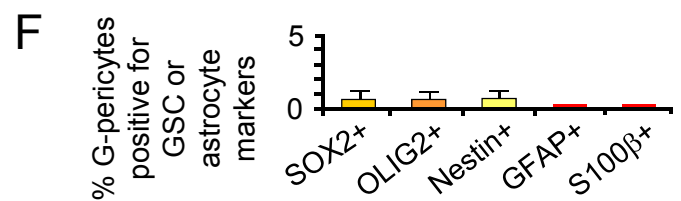

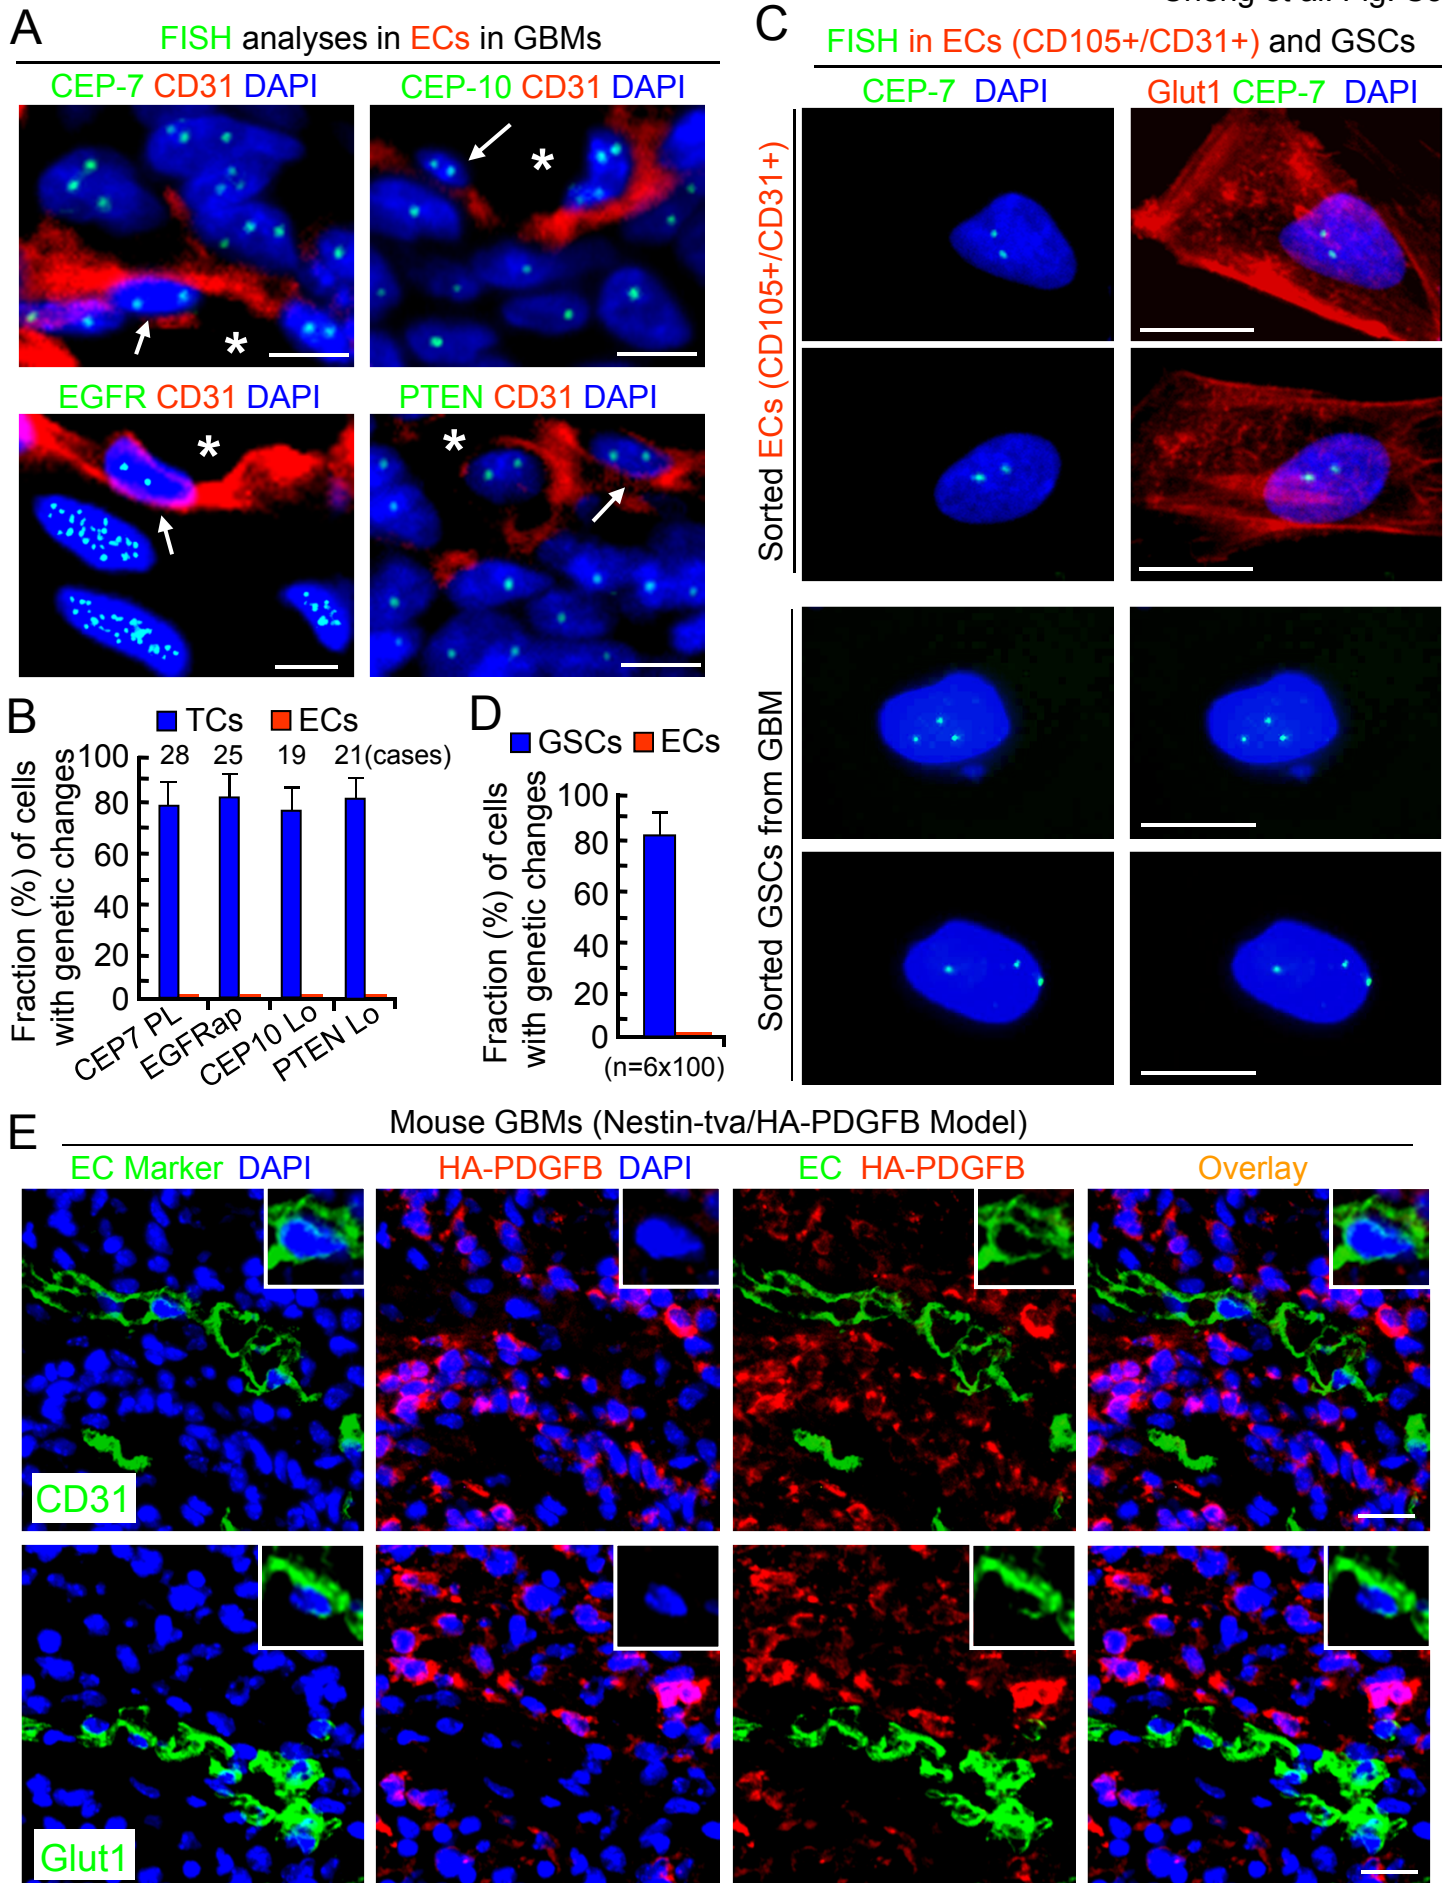

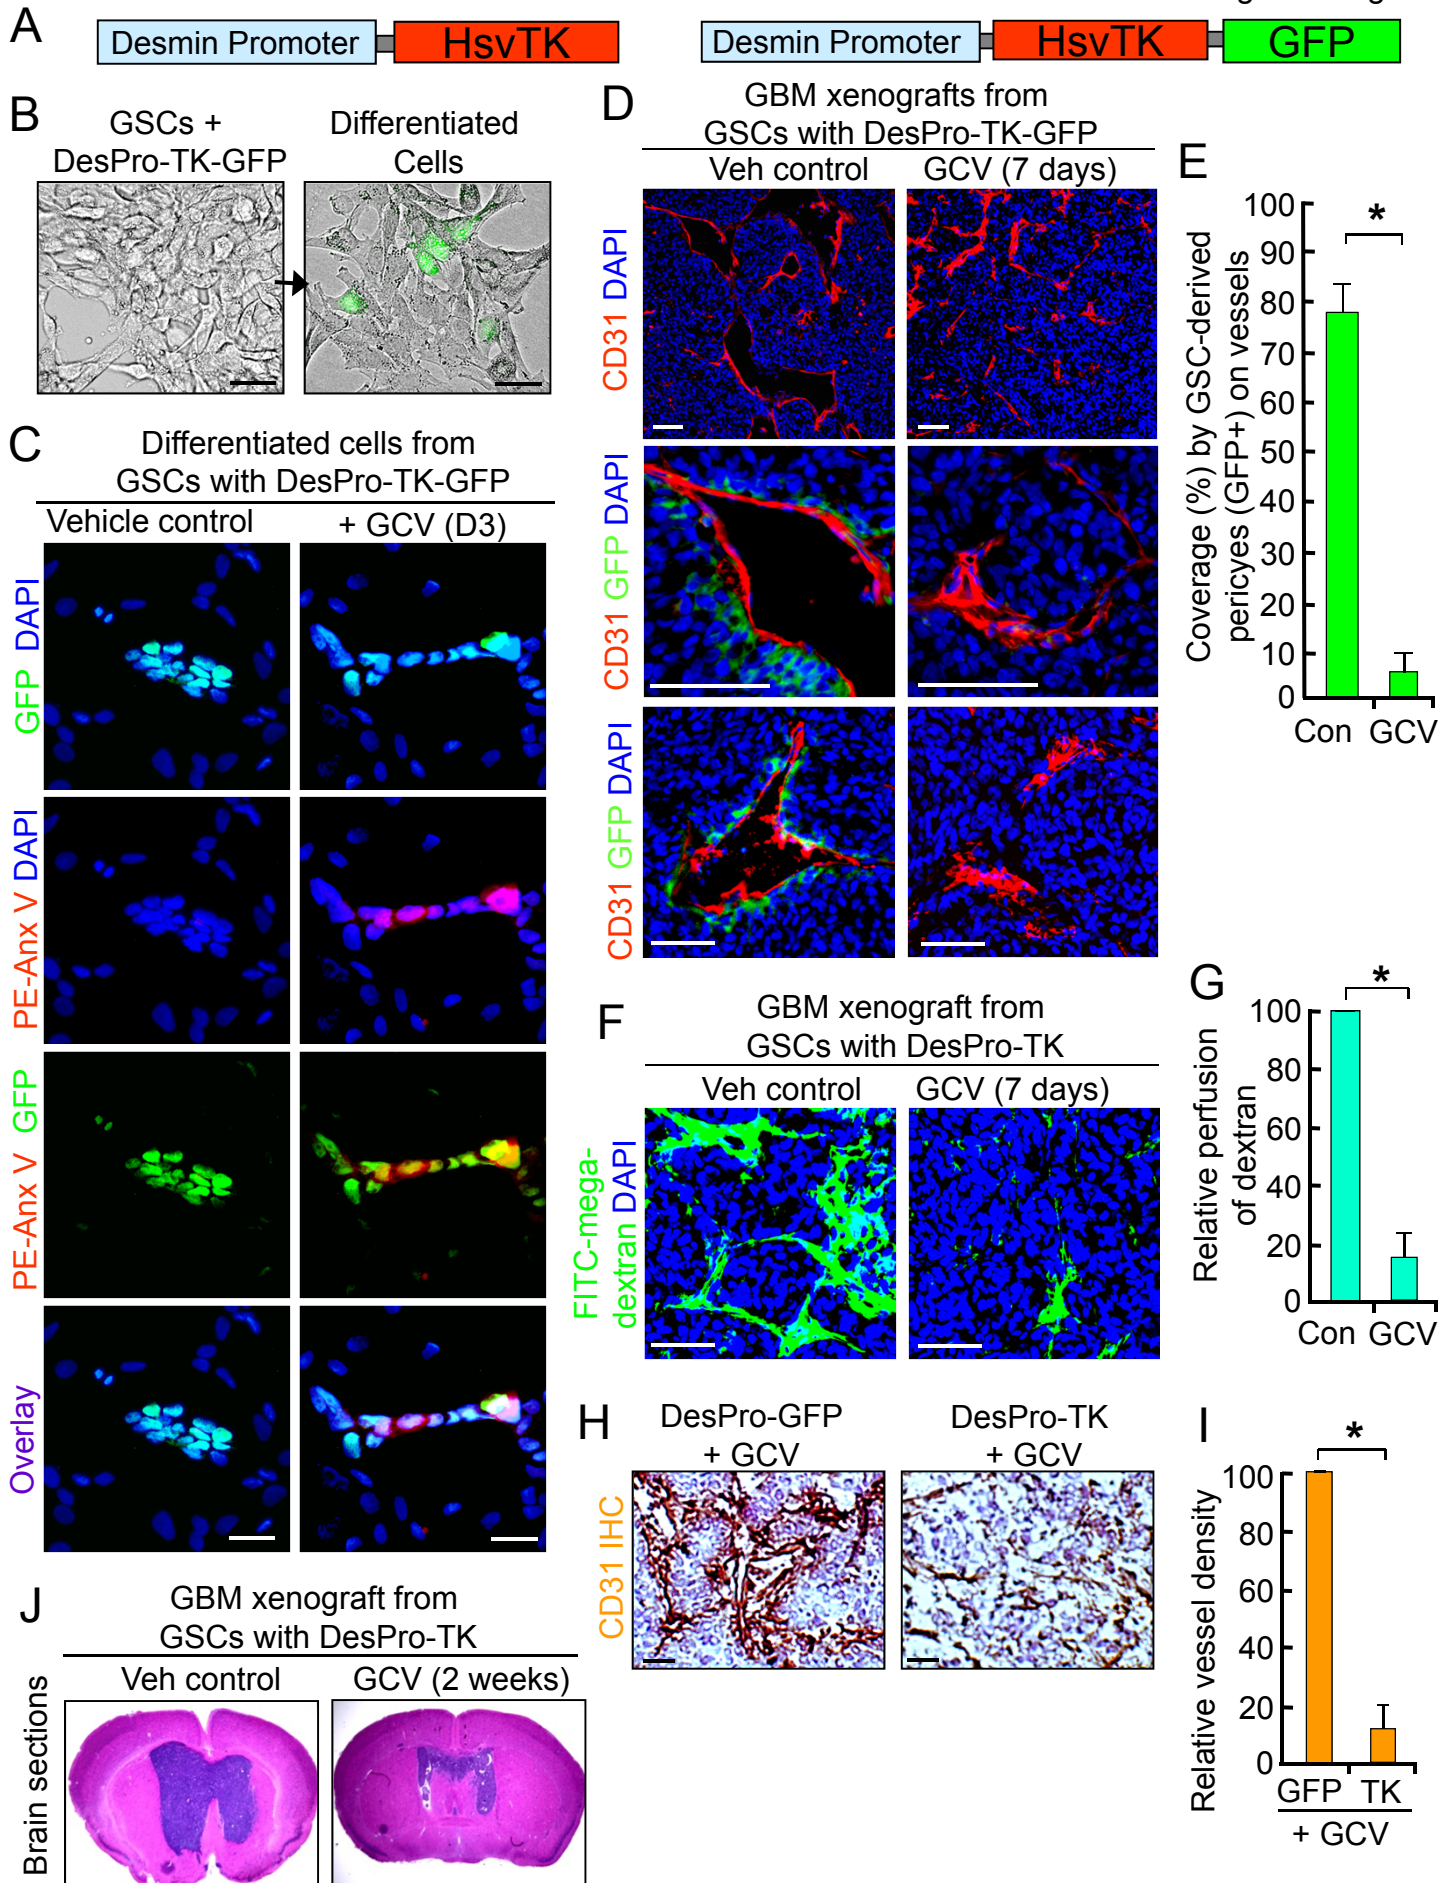

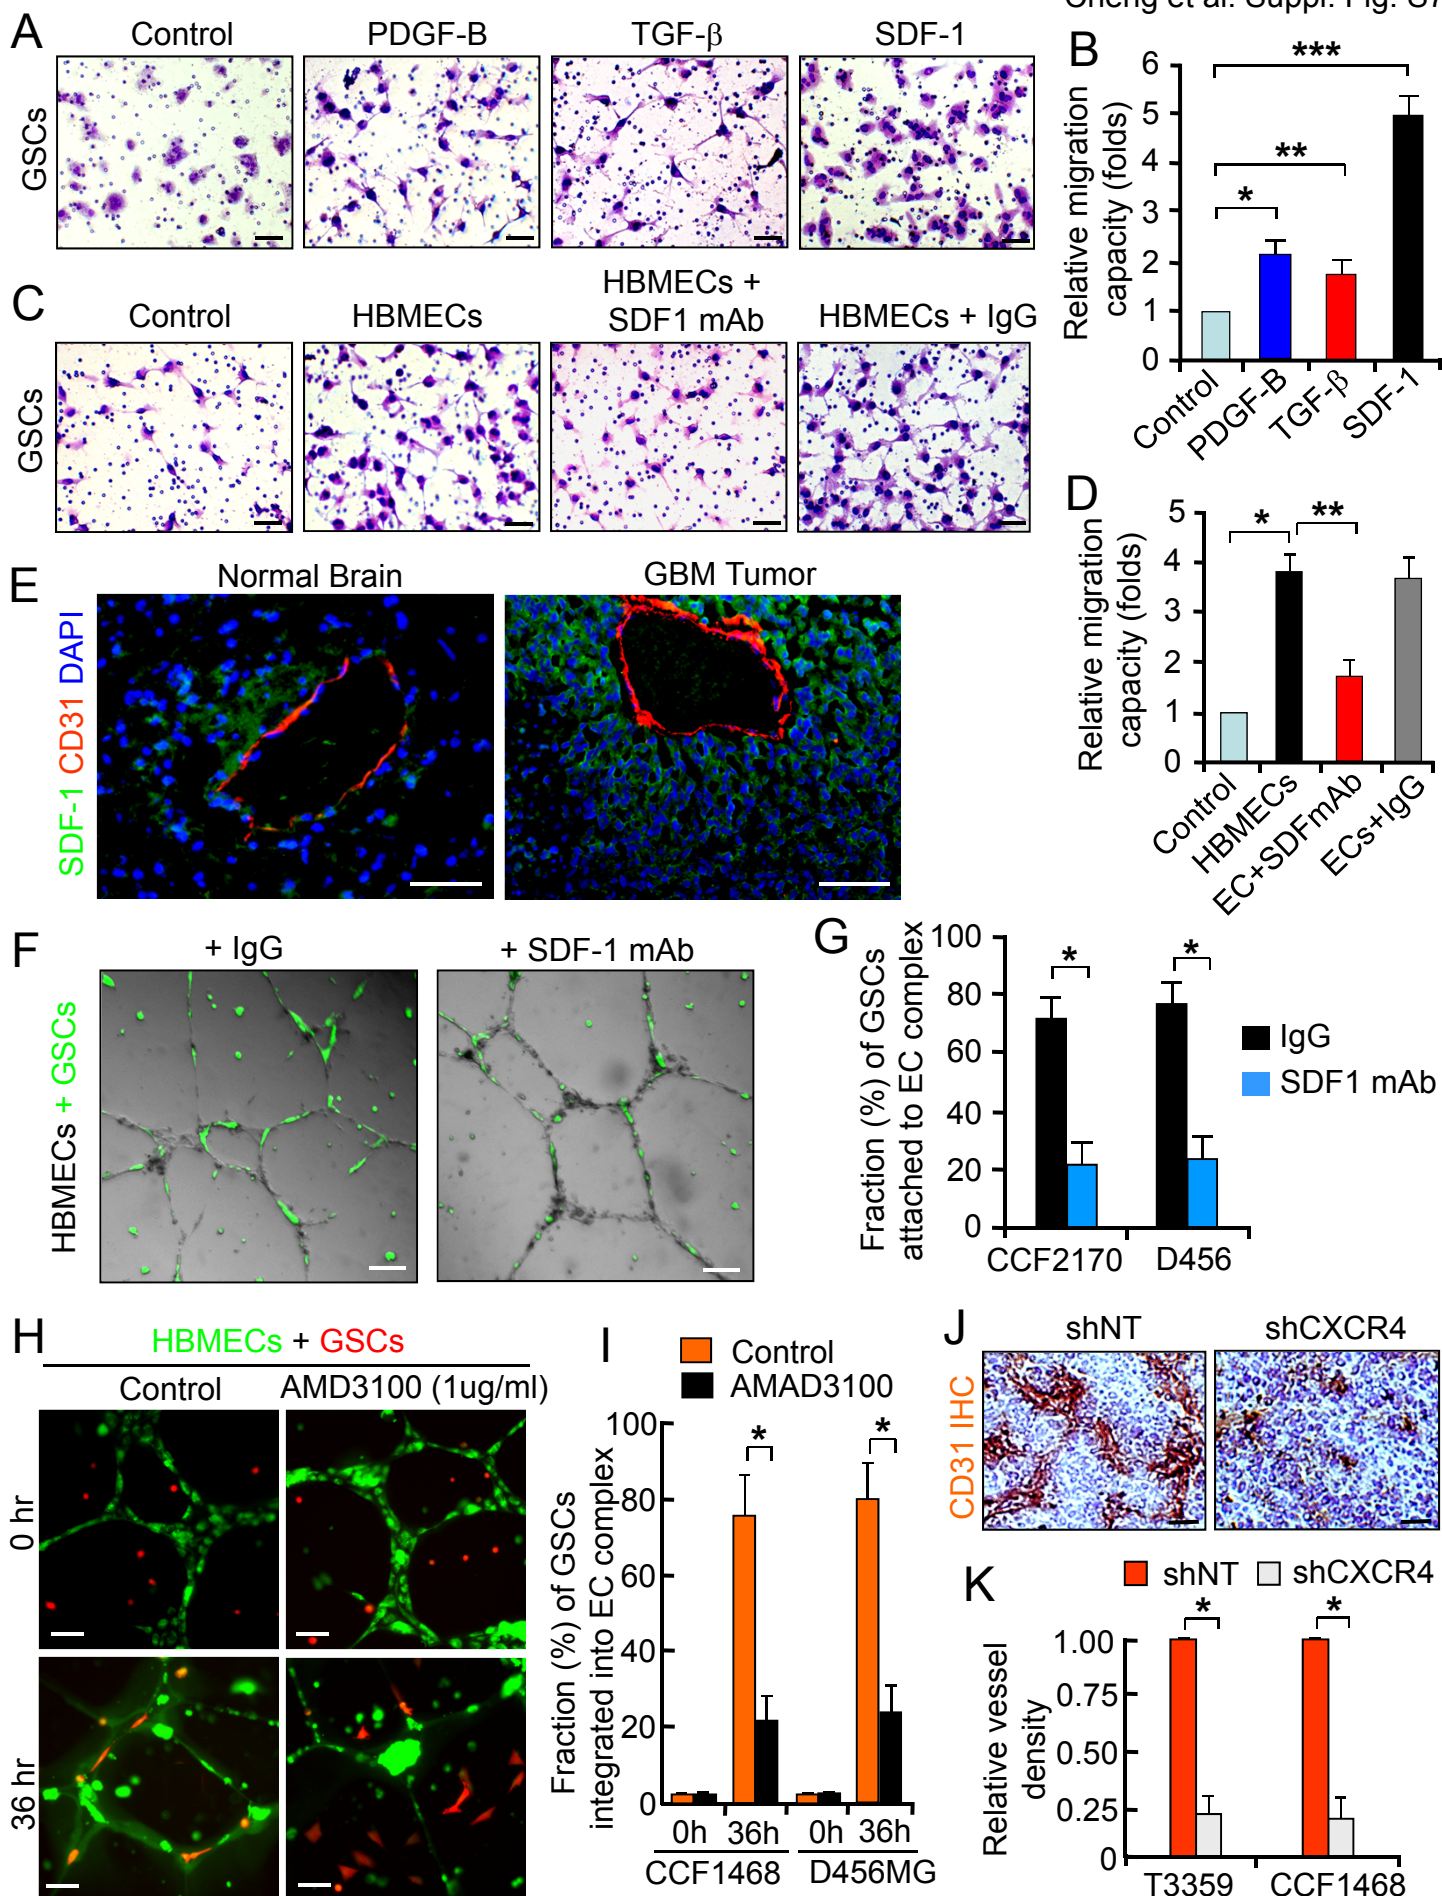

Supplement: NIHMS458902-supplement-02.pdf [file NIHMS458902-supplement-02.pdf]
